# Supplementary material
Source: ML conference proceedings conference paper supplement (https://openaccess.thecvf.com/content/CVPR_2020/html/Iqbal_Weakly-Supervised_3D_Human_CVPR_2020_paper.html)
Supplement: Supplementary file 1 [file 00413-supp.pdf › 000413-supp/00413-supp.pdf]

# Supplementary Material

## Weakly-Supervised 3D Human Pose Learning via Multi-view Images in the Wild

Umar Iqbal    Pavlo Molchanov    Jan Kautz  
NVIDIA  
{uiqbal, pmolchanov, jkautz}@nvidia.com

We provide implementation details to reproduce the results in the paper.

### 1. Implementation Details

We adopt HRNet-w32 [1] as the back-bone of our network architecture. We pre-train the model for 2D pose estimation before introducing weakly-supervised losses. This ensures that the 2D pose estimates are sufficiently good to enforce multi-view consistency  $\mathcal{L}_{MC}$ . We use MPII dataset for pre-training. The additional weights for latent depth-maps are not pre-trained. We use a maximum of four camera views  $C_n=4$  to calculate  $\mathcal{L}_{MC}$ . If a sample contains more than four views, we randomly sample four views from it in each epoch. We train the model with a batch size of 256, where each batch consists of 128 images with 2D pose annotations and 32 unlabeled multi-view samples ( $32 \times 4=128$  images). For pre-processing, we use a person bounding-box to crop the person into a  $256 \times 256$  image such that the person is centered and covers roughly 75% of the image. The training data is augmented by random scaling ( $\pm 20\%$ ) and rotation ( $\pm 30\%$  degrees). We found that the training converges after 60k iterations. The learning rate is set to  $5e-4$ , which drops to  $5e-5$  at 50k iterations following the Adam optimization algorithm. We use  $\lambda=50$ . Since the training objectives (6) and (7) consist of multiple loss terms, we balance their contributions by empirically choosing  $\psi=5$ ,  $\alpha=10$ , and  $\beta=100$ . Since our pose estimation model estimates absolute 3D pose up to a scaling factor, during inference, we approximate the scale using mean bone-lengths from the training data:

$$\hat{s} = \operatorname{argmin}_s \sum_{j,j' \in \mathcal{E}} (s \cdot \|\hat{\mathbf{p}}_j - \hat{\mathbf{p}}_{j'}\| - \mu_{j,j'}^L)^2, \quad (1)$$

where  $\mu_{j,j'}^L$  is the mean length of the limb formed by joint pair  $(j, j')$ . In all of our experiments, we use mean lengths from the training set of H36M dataset.

### References

- [1] Ke Sun, Bin Xiao, Dong Liu, and Jingdong Wang. Deep high-resolution representation learning for human pose estimation. In *CVPR*, 2019. 1
